# Supplementary material for: Amplified optical aptasensors through the endonuclease-stimulated regeneration of the analyte
Source: Royal Society of Chemistry journal article supplement (doi:10.1039/c2sc20426f), 2012-01-01
Supplement: c2sc20426f.pdf [file c2sc20426f.pdf]

## SUPPORTING INFORMATION

# Amplified Optical Aptasensors through the Endonuclease-Stimulated Regeneration of the Analyte

Chun-Hua Lu,<sup>‡</sup> Fuan Wang<sup>‡</sup> and Itamar Willner<sup>\*</sup>

Institute of Chemistry, The Minerva Center Biohybrid Complex Systems,

The Hebrew University of Jerusalem, Jerusalem 91904, Israel

<sup>‡</sup> Equal contributors to the research.

<sup>\*</sup> To whom all correspondence should be addressed.

E-mail: [willnea@vms.huji.ac.il](mailto:willnea@vms.huji.ac.il). Tel: 972-2-6585272. Fax: 972-2-6527715.

### 1. Non-amplified aptamer system for ATP detection

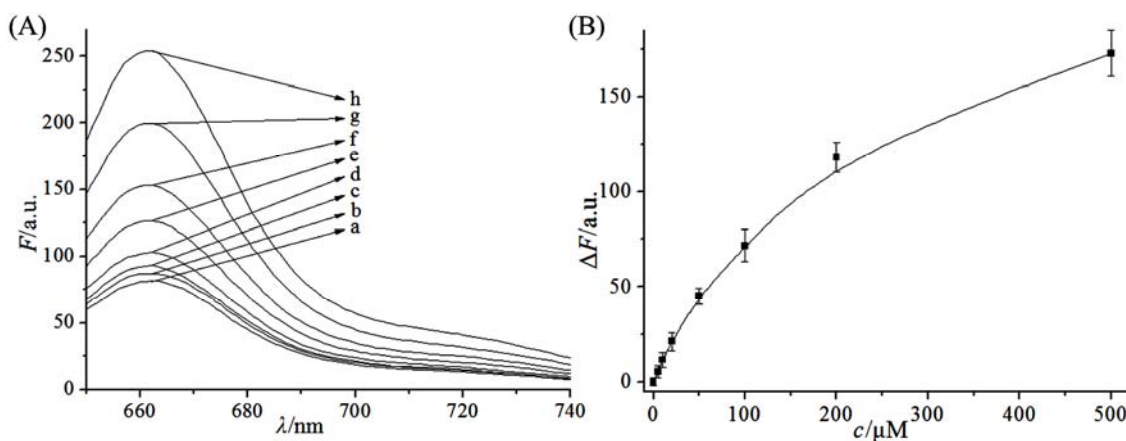

**Fig. S1** (A) Fluorescence spectra corresponding to the analysis of different concentrations of ATP according to Figure 1A. Spectra recorded after a fixed time interval of 2 h. Concentrations of ATP correspond to (a) 0  $\mu M$ ; (b) 5  $\mu M$ ; (c) 10  $\mu M$ ; (d) 20  $\mu M$ ; (e) 50  $\mu M$ ; (f) 100  $\mu M$ ; (g) 200  $\mu M$ ; (h) 500  $\mu M$ . (B) Calibration curve corresponding to the resulting fluorescence intensities at  $\lambda = 662$  nm upon analyzing different concentrations of ATP.

## 2. Polyacrylamide gel electrophoresis

To support the endonuclease-mediated cleavage of the aptamer subunits/ATP complex we performed complementary gel electrophoresis experiments. Nonetheless, to follow the different fragmentation products we modified the blocker unit (**3**) and one of the aptamer subunits (**2**) by tethering to their 5'- and 3'-ends non-relevant nucleic acid chains that are aimed to increase the molecular weight of the respective oligonucleotides, as shown in **Fig. S2 (A)**. The blocker unit (**3a**) and the subunit (**2a**) were used as modified components

**2a:** 5'-**TTT**TAGGCCTGGGGGAGTATCAGCTGTAT**T**-3'

**3a:** 5'-**TTTTTTTTTTTTTTTTTTTTTTTTTTTTTT**CTTCCTCCGCTCAG-3'

After the endonuclease-mediated cleavage of the aptamer subunits (**1**)(**2a**)-ATP complex, the fragmented nucleic acid **X** being a part of (**2a**) and the oligonucleotide composed of sequence **Y**, that hybridizes with the blocker (**3a**), are formed.

**X**= CCTGGGGGAGTATCAG

**Y**= CTGAGCGGAGGAAGG

**Fig. S2(B)** shows the denatured gel electrophoresis of the resulting system. The fragmented components are clearly observed only in the system that includes the endonucleases.

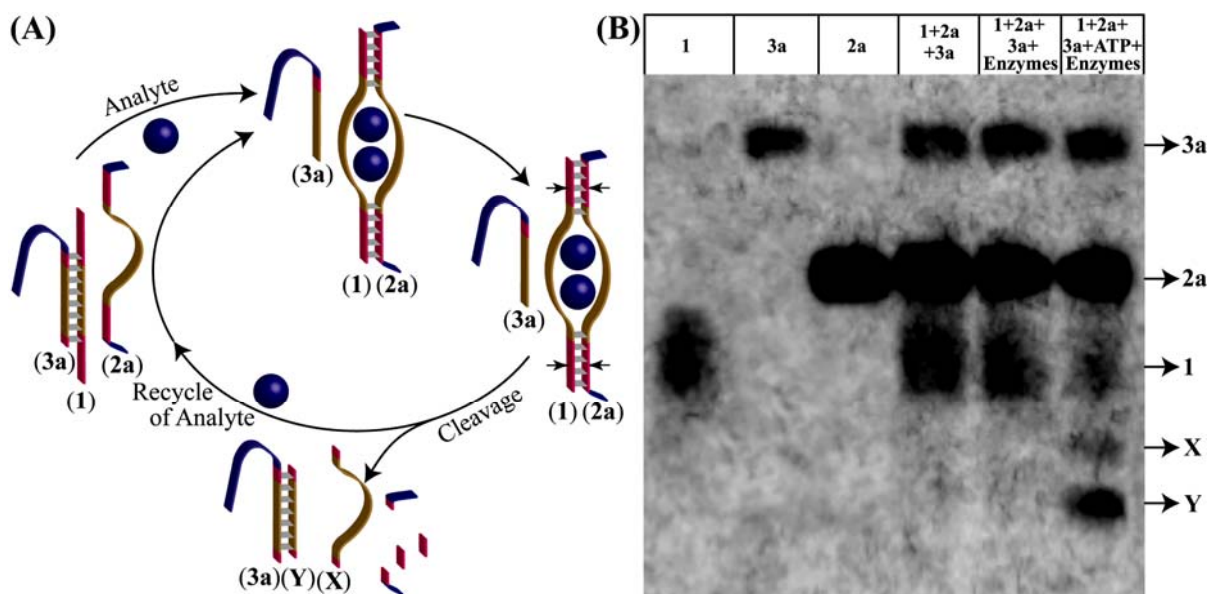

**Fig. S2** (A) Schematic amplified detection of ATP. (B) The denatured gel electrophoresis.

### 3. Non-amplified aptamer system for VP detection

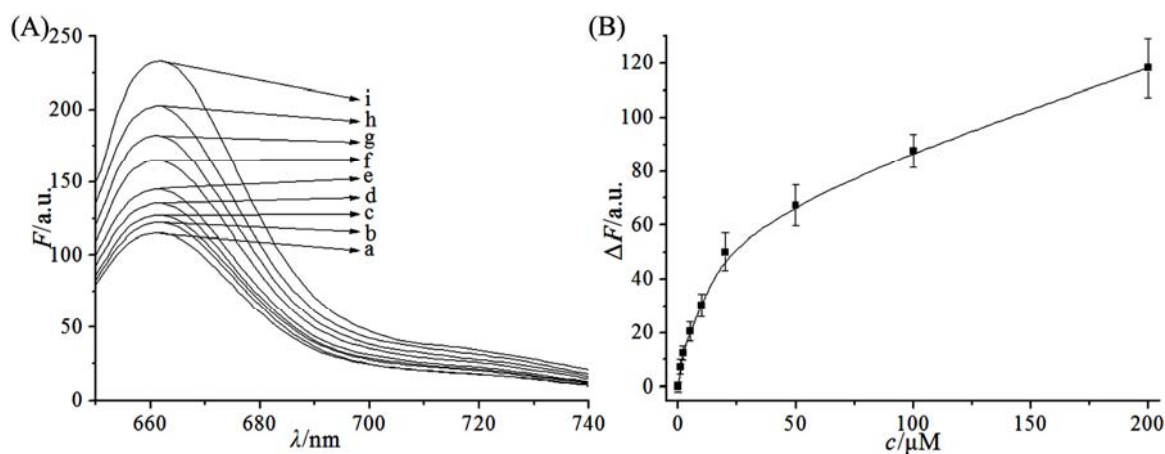

**Fig. S3** (A) Fluorescence spectra corresponding to the analysis of different concentrations of VP using the non-amplified aptamer subunits system. Spectra recorded after a fixed time interval of 2 h. Concentrations of VP correspond to: (a) 0  $\mu\text{M}$ ; (b) 1  $\mu\text{M}$ ; (c) 2  $\mu\text{M}$ ; (d) 5  $\mu\text{M}$ ; (e) 10  $\mu\text{M}$ ; (f) 20  $\mu\text{M}$ ; (g) 50  $\mu\text{M}$ ; (h) 100  $\mu\text{M}$ ; (i) 200  $\mu\text{M}$ . (B) Calibration curve corresponding to the resulting fluorescence intensities at  $\lambda = 662 \text{ nm}$  upon analyzing different concentrations of VP.

#### 4. Non-amplified aptamer system for cocaine detection

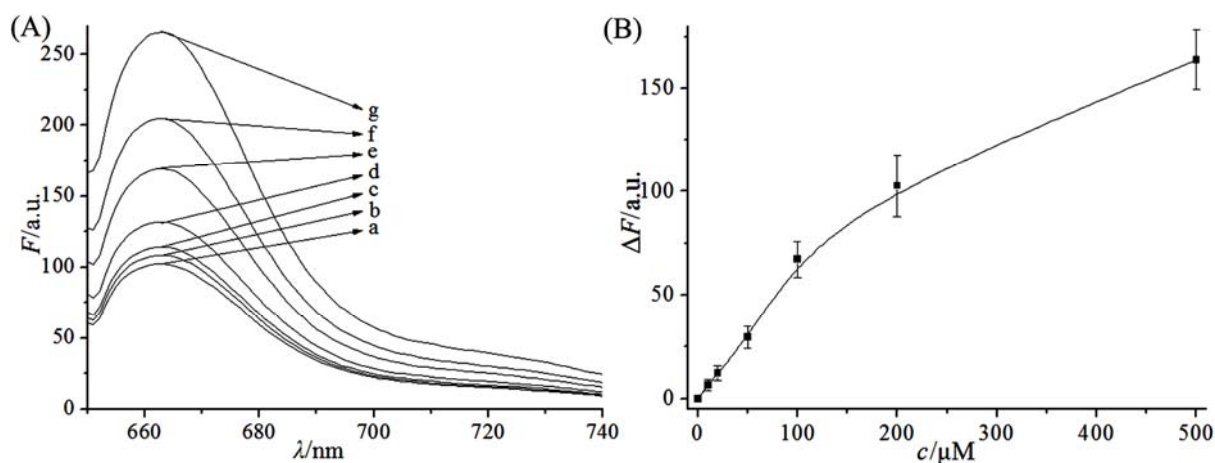

**Fig. S4** (A) Fluorescence spectra corresponding to the analysis of different concentrations of cocaine using the non-amplified aptamer subunits system. Spectra were recorded after a fixed time-interval that corresponded to 2 h. Concentrations of cocaine correspond to: (a) 0  $\mu\text{M}$ ; (b) 10  $\mu\text{M}$ ; (c) 20  $\mu\text{M}$ ; (d) 50  $\mu\text{M}$ ; (e) 100  $\mu\text{M}$ ; (f) 200  $\mu\text{M}$ ; (g) 500  $\mu\text{M}$ . (B) Calibration curve corresponding to the resulting fluorescence intensities at  $\lambda = 662$  nm upon analyzing different concentrations of cocaine.
